# Supplementary material for: A highly efficient macromonomer approach to core cross-linked star (CCS) polymers via one-step RAFT emulsion polymerization
Source: Royal Society of Chemistry journal article supplement (doi:10.1039/c4py00135d), 2014-01-01
Supplement: c4py00135d1.pdf [file c4py00135d1.pdf]

## Supporting Information

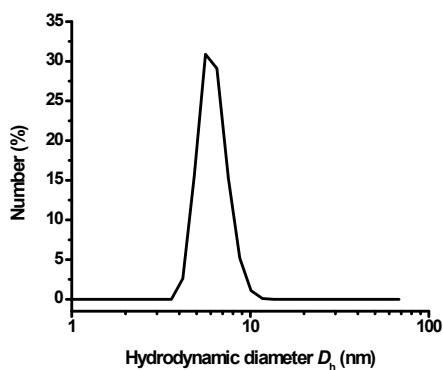

**Fig. S1** DLS of the polymer synthesized under conditions: solid content 10% w/v, 70 °C, 4 h, molar ratio of CTA:PEGMA2K:V-50 = 1:5:0.2, [PBS] = 0.15 M.

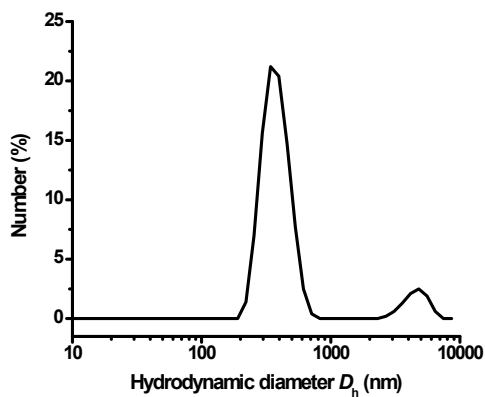

**Fig. S2** DLS of the polymer synthesized under conditions: solid content 10% w/v, 70 °C, 4 h, molar ratio of PEGMA2K : HDDMA : BMA : V-50 = 5:15:10:0.2, [PBS] = 0.15 M.
